# Supplementary material for: Staphylococcal Resistance Patterns, blaZ and SCCmec Cassette Genes in the Nasopharyngeal Microbiota of Pregnant Women
Source: MDPI journal article supplement (doi:10.3390/ijms24097980), 2023-04-28
Supplement: s1 [file s1]

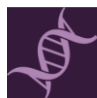

# Supplementary Materials:

**Table S1.** Primer sequences and amplification conditions in PCR reactions for the detection of *blaZ*, *mecA* and *mecC* genes used in this study.

| Gene        | Primer sequences (5' → 3')                        | Amplicon size (bp) | Reference |
|-------------|---------------------------------------------------|--------------------|-----------|
| <i>blaZ</i> | TGCTGATAAAAGTGGTCAAGCA<br>ACACTCTTGGCGGTTTCACT    | 165                | [12]      |
| <i>mecA</i> | TCCAGATTACAACCTTCACCAGG<br>CCACTTCATATCTTGTAACG   | 162                | [32]      |
| <i>mecC</i> | GAAAAAAAGGCTTAGAACGCCTC<br>GAAGATCTTTTCCGTTTTCAGC | 138                |           |

**Table S2.** SCC*mec* cassette genes used in this study based on [27].

| Reaction | Gene or gene allele detected          | Type/class of <i>ccr</i> complex | Amplicon size (bp) |
|----------|---------------------------------------|----------------------------------|--------------------|
| M-PCR 1  | <i>mecA</i>                           | II                               | 286                |
|          | <i>ccrA1-ccrB</i>                     | I                                | 695                |
|          | <i>ccrA2-ccrB</i>                     | II                               | 937                |
|          | <i>ccrA3-ccrB</i>                     | III                              | 1791               |
|          | <i>ccrA4-ccrB4</i>                    | VI                               | 1287               |
|          | <i>ccrC</i>                           | V                                | 518                |
| M-PCR 2  | <i>mecA-mecI</i>                      | II                               | 1963               |
|          | <i>mecA-IS1272</i>                    | I                                | 2827               |
|          | <i>mecA-IS431</i>                     | V                                | 804                |
| M-PCR 3  | E007 in type I SCC <i>mec</i>         | I                                | 154                |
|          | CQ02 in type IV (IVa) SCC <i>mec</i>  | IV                               | 458                |
|          | M001 in type IV (IVb) SCC <i>mec</i>  | IV                               | 726                |
|          | CR008 in type IV (IVc) SCC <i>mec</i> | IV                               | 259                |
|          | CD002 in type IV (IVd) SCC <i>mec</i> | IV                               | 1242               |

Abbreviations: M-PCR 1-3 - multiplex-PCR reactions 1-3

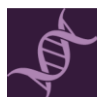

**Table S3.** The frequency of the individual genes detected in this study in relation to the staphylococcal *mecA*-positive species and the number of isolates obtained from a pregnant patient.

| Patient no. | Age | Trimester | Antibiotic use history | No. of staphylococcal strains isolated | No. of strain | Species               | MALDI-TOF MS identification |           | Resistance profile  | Beta-lactam genes |             |             | Type of <i>ccr</i> compl ex | Class of <i>mec</i> gene compl ex | SCC <sub>mec</sub> cassette | Type according to [14] |
|-------------|-----|-----------|------------------------|----------------------------------------|---------------|-----------------------|-----------------------------|-----------|---------------------|-------------------|-------------|-------------|-----------------------------|-----------------------------------|-----------------------------|------------------------|
|             |     |           |                        |                                        |               |                       | score                       | index ±SD |                     | <i>blaZ</i>       | <i>mecA</i> | <i>mecC</i> |                             |                                   |                             |                        |
| C20         | 26  | III       | very rare              | 2                                      | C20-1         | <i>S. epidermidis</i> | 2.042                       | 0.045     | PNG,FOX,ERY,C       | +                 | +           | -           | IV                          | B                                 | VI                          | VI                     |
| C33         | 27  | III       | rare                   | 3                                      | C33-1         | <i>S. aureus</i>      | 2.248                       | 0.051     | PNG,FOX,CIP,TET,SXT | +                 | +           | -           | V                           | -                                 | ND                          | -                      |
|             |     |           |                        |                                        | C33-2         | <i>S. aureus</i>      | 2.023                       | 0.010     | PNG,TET,C           | +                 | +           | -           | IV                          | -                                 | ND                          | -                      |
| c35         | 28  | I         | rare                   | 2                                      | C35-2         | <i>S. aureus</i>      | 1.963                       | 0.085     | PNG,ERY             | +                 | +           | -           | -                           | -                                 | ND                          | -                      |
|             |     |           |                        |                                        | C35-3         | <i>S. aureus</i>      | 2.004                       | 0.019     | PNG,FOX,ERY         | +                 | +           | -           | IV                          | -                                 | ND                          | -                      |
| c36         | 32  | II        | rare                   | 2                                      | C36-1         | <i>S. aureus</i>      | 2.105                       | 0.020     | PNG,ERY             | -                 | +           | +           | -                           | -                                 | ND                          | -                      |
| c38         | 32  | III       | very rare              | 2                                      | C38-7         | <i>S. aureus</i>      | 2.029                       | 0.030     | PNG                 | +                 | +           | -           | -                           | -                                 | ND                          | -                      |
| c39         | 33  | II        | very rare              | 3                                      | C39-2         | <i>S. aureus</i>      | 1.962                       | 0.006     | PNG,C               | +                 | +           | -           | -                           | -                                 | ND                          | -                      |
| c40         | 30  | III       | rare                   | 1                                      | C40-1         | <i>S. aureus</i>      | 2.121                       | 0.026     | PNG,FOX             | +                 | +           | -           | V                           | -                                 | ND                          | -                      |
| c49         | 29  | III       | very rare              | 3                                      | C49-2         | <i>S. aureus</i>      | 2.301                       | 0.048     | PNG,FOX,CIP         | +                 | +           | -           | I                           | A                                 | ND                          | UT5v                   |
| c51         | 24  | III       | very rare              | 1                                      | C51-5         | <i>S. hominis</i>     | 2.028                       | 0.67      | PNG,FOX,TET,ERY,SXT | +                 | +           | -           | -                           | A                                 | ND                          | -                      |
| c52         | 31  | III       | very rare              | 1                                      | C52-7         | <i>S. hominis</i>     | 2.193                       | 0.017     | PNG,FOX,ERY         | +                 | +           | -           | I                           | A                                 | ND                          | UT5v                   |
| c63         | 29  | II        | very rare              | 2                                      | C63-1         | <i>S. hominis</i>     | 2.052                       | 0.023     | PNG,FOX,TET,ERY     | +                 | +           | -           | -                           | -                                 | ND                          | -                      |
|             |     |           |                        |                                        | C63-2         | <i>S. epidermidis</i> | 2.086                       | 0.045     | PNG,FOX             | +                 | +           | -           | IV+V                        | -                                 | ND                          | -                      |

**Abbreviations:** “+/-” – the presence or absence of gene tested, ND - not defined, PNG - benzylopicillin (1 U), CIP - ciprofloxacin (5 µg), NOR - norfloxacin (10 µg), TET - tetracycline (30 µg), LIN - linezolid (10 µg), ERY - erythromycin (15 µg), C - chloramphenicol (30 µg), SXT - trimethoprim-sulfamethoxazole (1.25 µg -23.75 µg)
